# Supplementary material for: Evaluation of Machine Learning Predictions of a Highly Resolved Time Series of Chlorophyll-a Concentration
Source: MDPI journal article supplement (doi:10.3390/app11167208), 2021-08-05
Supplement: s1 [file s1]

# Evaluation of Machine Learning Predictions of a Highly Resolved Time Series of Chlorophyll-a Concentration

Felipe de Luca Lopes de Amorim, Johannes Rick, Gerrit Lohmann and Karen Helen Wiltshire

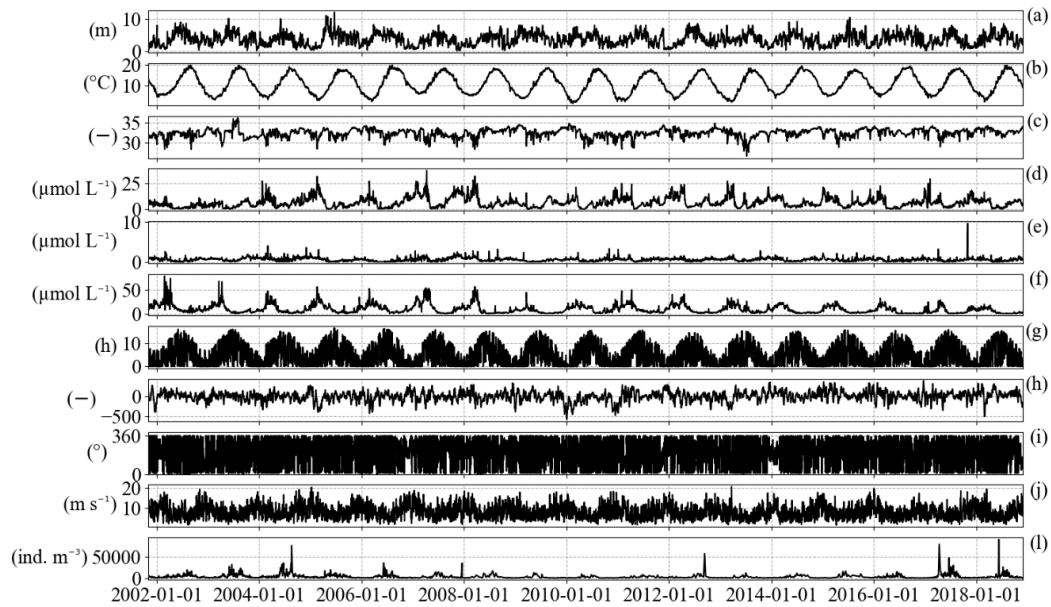

**Figure S1.** : Time series of parameters used to predict chlorophyll-a concentration: (a) Secchi disk depth, in meters (m); (b) Sea Surface Temperature, in degrees Celsius (°C); (c) Salinity (–); (d) Silicate ( $\mu\text{mol L}^{-1}$ ); (e) Phosphate ( $\mu\text{mol L}^{-1}$ ); (f) Nitrate ( $\mu\text{mol L}^{-1}$ ); (g) Sunlight duration, in hours (h); (h) NAO index (–); (i) Wind Direction, in degrees (°); (j) Wind Speed, in meters per second ( $\text{m s}^{-1}$ ); and (l) Total zooplankton abundance, individuals per cubic meter ( $\text{ind. m}^{-3}$ ).
